# Supplementary material for: Prevalence and determinants of differences in cystatin C and creatinine-based estimated glomerular filtration rate in community-dwelling older adults: a cross-sectional study
Source: Springer Nature journal article supplement (doi:10.1186/s12882-017-0759-3), 2017-12-01
Supplement: MOESM1 [file 15277214]

## Variable methods

| Variable           | Collection method                                                                                                                                                                                                                      | Coding                                                                                                                 |
|--------------------|----------------------------------------------------------------------------------------------------------------------------------------------------------------------------------------------------------------------------------------|------------------------------------------------------------------------------------------------------------------------|
| Sex                | Extracted from personal identity number, which includes coding for sex.                                                                                                                                                                | Male or female                                                                                                         |
| Age                | Calculated from study visit date and personal identity number, which includes birth date.                                                                                                                                              | Continuous variable                                                                                                    |
| Smoking            | Self-reported by participants in a questionnaire; possible answers to the question "do you smoke" were: "yes, regularly," "yes, occasionally," "no, no longer smoke," and "no, have never smoked."                                     | Regular or occasional smoking classified as current, no longer smoke classified as former, third category never smoked |
| Hypertension       | Medical questionnaire completed by physician based on the medical record and participant report. Question was: "is patient currently under treatment for hypertension?"                                                                | Yes or no                                                                                                              |
| BMI                | Calculated from current weight and height collected by nurse during nursing portion of the baseline exam.                                                                                                                              | Continuous variable                                                                                                    |
| Diabetes           | Medical questionnaire completed by physician based on the medical record and participant report. One question for diabetes type 1 and one question for diabetes type 2.                                                                | Participants with at least one diabetes diagnosis coded as yes, those without any diabetes diagnosis coded as no       |
| Thyroid function   | Medical questionnaire completed by physician. First question whether participant has thyroid illness. If yes, follow-up question to categorize whether hypo- or hyperthyroid.                                                          | Categories hypothyroid, hyperthyroid, euthyroid                                                                        |
| Cystatin C         | Blood sample taken at baseline study by nurse, frozen, and analyzed in one batch in 2007 by hospital laboratory using Gentians reagent with a Beckman Coulter LX 20.                                                                   | Continuous variable                                                                                                    |
| Creatinine         | Blood sample taken at baseline study by nurse, frozen, and analyzed in one batch in 2007 by hospital laboratory using a modified Jaffe method with a Beckman Coulter LX 20 traceable to IDMS.                                          | Continuous variable                                                                                                    |
| CRP                | Blood sample taken at baseline study by nurse and analyzed daily by hospital laboratory.                                                                                                                                               | Continuous variable                                                                                                    |
| Glucocorticoid use | Medical questionnaire completed by physician based on the medical record and participant report. Question asks for all current medications taken by the patient, both daily and as needed. Glucocorticoids selected by ATC code H02AB. | Yes or no                                                                                                              |
